# Supplementary material
Source: publisher figshare collection journal article supplement (https://rs.figshare.com/ndownloader/files/30793059)
Supplement: Supplementary file 1 [file 30793059]

**Figure S1**

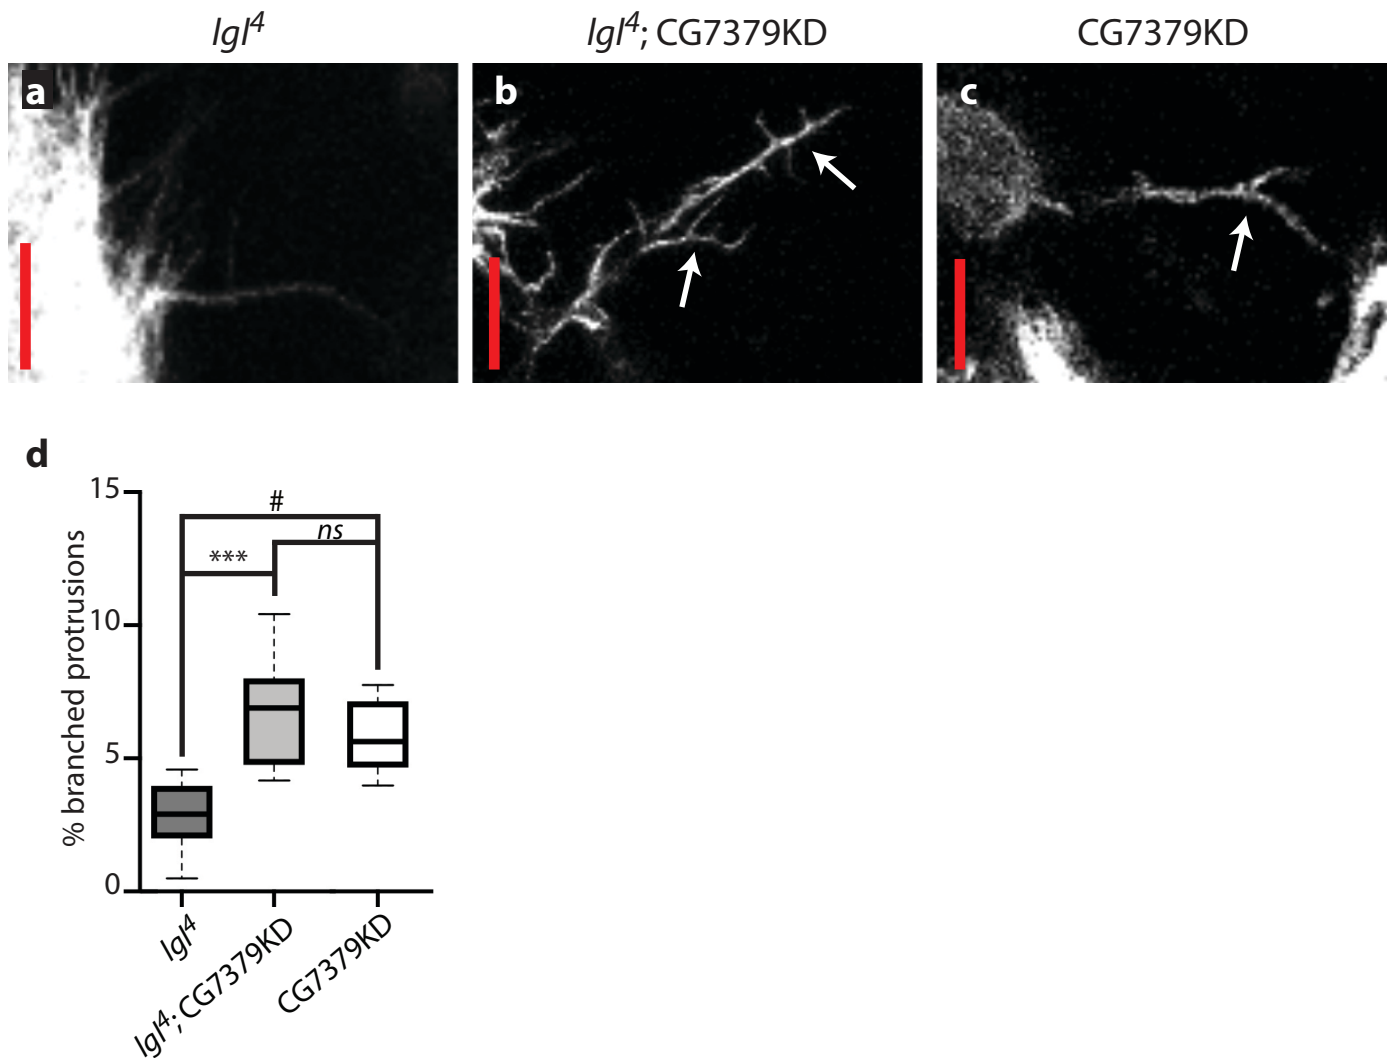

**Figure S1: Abnormal protrusion morphology following CG7379KD**

**(a-c)** Example of typical basal protrusion morphology from *Igf4* cells (a), and examples of abnormal branched protrusions from *Igf4*; CG7379KD (b) and CG7379KD (c) cells. Images represent z stack projections of relevant basal confocal slices. Arrows highlight branched protrusions. **(d)**

Quantification of branched protrusion occurrence.  $n \geq 100$  protrusions/animal from a minimum of 7 animals/genotype. One-way ANOVA was performed to determine statistical significance. Scale bar =  $10 \mu\text{m}$ . \*  $p < 0.05$ ; \*\*  $p < 0.01$ ; \*\*\*  $p < 0.001$ ; #  $p < 0.0001$ .
